# Supplementary material for: Novel fluorescent probes based on nitrogen–sulfur co-doped carbon dots for chromium ion detection
Source: Royal Society of Chemistry journal article supplement (doi:10.1039/d0nj06178f), 2021-01-01
Supplement: d0nj06178f1.pdf [file d0nj06178f1.pdf]

## Support information

### Novel fluorescent probe based on nitrogen-sulfur co-doped carbon dots for chromium ion detection

Jiaqing Guo<sup>1</sup>, Shuai Ye<sup>1\*</sup>, Hao Li<sup>1\*</sup>, Yue Chen<sup>1</sup>, Hao Liu<sup>1</sup>, Yiwan Song<sup>1</sup>, Xiao Peng<sup>1</sup>, Feifan

Zhou<sup>1</sup>, Jun Song<sup>1</sup>, Junle Qu<sup>1,2</sup>

1. Center for Biomedical Optics and Photonics (CBOP) & College of Physics and Optoelectronic Engineering, Key Laboratory of Optoelectronic Devices and Systems, Shenzhen University, Shenzhen 518060, P. R. China

2. National Research Nuclear University MEPhI (Moscow Engineering Physics Institute), 115409, Moscow, Russian Federation

Corresponding author: yes-121@163.com, lihao000000@163.com

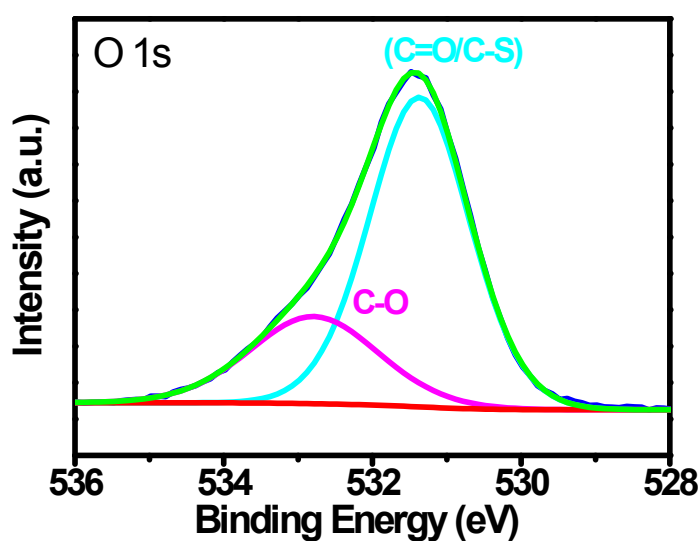

Figure S1 Corresponding high-resolution O<sub>1s</sub> spectra of NSCDs

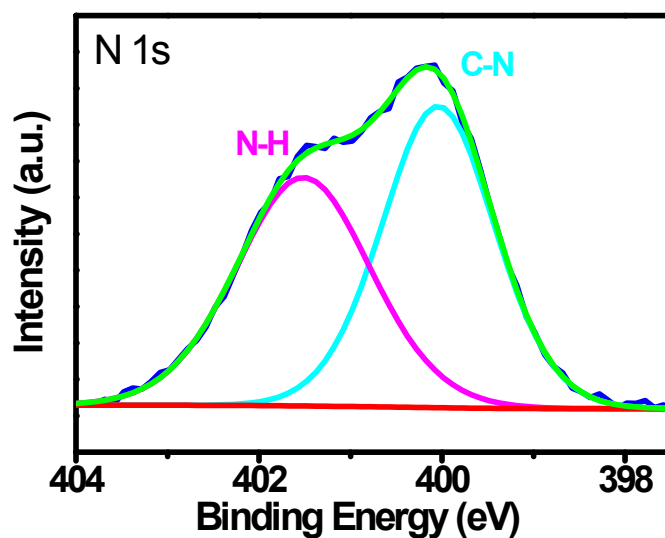

Figure S2 Corresponding high-resolution N<sub>1s</sub> spectra of NSCDs

Table S1 Comparison of LOD for the Cr<sup>3+</sup> detection by different probes

| Probe                | LOD<br>( $\mu\text{M}$ ) | Linear range<br>( $\mu\text{M}$ ) | Reference  |
|----------------------|--------------------------|-----------------------------------|------------|
| AuNPs                | 0.013                    | 0.3–3.0                           | [1]        |
| Citrate-Ag NPs       | 0.52                     | 1.0–50                            | [2]        |
| MNA-MA-AgNPs         | 0.064                    | 10–370                            | [3]        |
| CdSe QDs             | 0.03                     | 0.1–20                            | [4]        |
| MoS <sub>2</sub> QDs | 0.08                     | 0.1–10                            | [5]        |
| CTP-Ag NPs           | 6.25                     | 18.75–62.5                        | [6]        |
| Ag NCs               | 0.71                     | 2–40                              | [7]        |
| NSCDs                | 0.0078                   | 0–40                              | This paper |

**Table S2** Detection of Cr<sup>3+</sup> in real water samples

| Sample              | day | Found<br>( $\mu\text{M}$ ) | Added ( $\mu\text{M}$ )<br>) | Total<br>found ( $\mu\text{M}$ ) | Recovery<br>(%) | RSD(n=3)<br>(%) |
|---------------------|-----|----------------------------|------------------------------|----------------------------------|-----------------|-----------------|
| NSCDs1-tap<br>water | 0   | Not detected               | 0.10                         | 0.105                            | 105.0           | 3.24            |
|                     |     |                            | 0.50                         | 0.502                            | 100.4           | 2.89            |
|                     |     |                            | 1.00                         | 1.001                            | 100.1           | 3.66            |
|                     | 3   |                            | 0.10                         | 0.103                            | 103.0           | 3.87            |
|                     |     |                            | 0.50                         | 0.498                            | 99.6            | 2.74            |
|                     |     |                            | 1.00                         | 1.002                            | 100.2           | 5.82            |
|                     | 7   |                            | 0.10                         | 0.108                            | 108.0           | 3.65            |
|                     |     |                            | 0.50                         | 0.506                            | 101.2           | 3.89            |
|                     |     |                            | 1.00                         | 0.999                            | 99.9            | 2.89            |
| NSCDs2-tap<br>water | 0   | Not detected               | 0.10                         | 0.104                            | 104.0           | 0.82            |
|                     |     |                            | 0.50                         | 0.527                            | 105.4           | 3.68            |
|                     |     |                            | 1.00                         | 1.041                            | 104.1           | 2.92            |
|                     | 3   |                            | 0.10                         | 0.105                            | 105.0           | 3.17            |
|                     |     |                            | 0.50                         | 0.531                            | 106.2           | 3.24            |
|                     |     |                            | 1.00                         | 1.028                            | 102.8           | 2.67            |
|                     | 7   |                            | 0.10                         | 0.107                            | 106.5           | 2.75            |
|                     |     |                            | 0.50                         | 0.512                            | 102.4           | 3.89            |
|                     |     |                            | 1.00                         | 1.023                            | 102.3           | 3.96            |
| NSCDs3-tap<br>water | 0   | Not detected               | 0.10                         | 0.103                            | 103.0           | 2.47            |
|                     |     |                            | 0.50                         | 0.503                            | 100.6           | 2.78            |
|                     |     |                            | 1.00                         | 1.017                            | 101.7           | 1.92            |
|                     | 3   |                            | 0.10                         | 0.109                            | 109.0           | 1.99            |
|                     |     |                            | 0.50                         | 0.503                            | 100.6           | 3.23            |
|                     |     |                            | 1.00                         | 1.023                            | 102.3           | 4.13            |
|                     | 7   |                            | 0.10                         | 0.108                            | 108.0           | 2.23            |
|                     |     |                            | 0.50                         | 0.506                            | 101.2           | 3.18            |
|                     |     |                            | 1.00                         | 1.014                            | 101.4           | 4.67            |

- [1] Ma J, Yang B, Byrne RH. Determination of nanomolar chromate in drinking water with solid phase extraction and a portable spectrophotometer. *Journal of Hazard Mater* 2012; 219-220: 247–252.
- [2] Guerrero MML, Alonso EV, Pavon JMC, Cordero MTS, Torres AG Online reconcentration using chelating and ion-exchange minicolumns for the speciation of chromium(III) and chromium(VI) and their quantitative determination in natural waters by inductively coupled plasma mass spectrometry. *Journal of Analytical Atomic Spectrometry* 2012; 27: 682–688.
- [3] Sumida T, Ikenoue T, Hamada K, Sabarudin A, Oshima M, Motomizu S. On-line preconcentration using dual mini-columns for the speciation of chromium(III) and chromium(VI) and its application to water samples as studied by inductively coupled plasma-tomic emission spectrometry. *Talanta* 2005; 68: 388–393.
- [4] Shellaiah M, Simon T, Kien, Sun W, Ko FH. Simple bare gold nanoparticles for rapid colorimetric detection of Cr<sup>3+</sup> ions in aqueous medium with real sample applications. *Sensors and Actuators B* 2016; 226: 44–51.
- [5] Desai ML, Jhab S, Basu H, Sahac S, Singhal SK, Kailasa SK. Simple hydrothermal approach for synthesis of fluorescent molybdenum disulfide quantum dots: Sensing of Cr<sup>3+</sup> ion and cellular imaging. *Materials Science & Engineering C* 2020; 111: 110778-110787.
- [6] Yang CH, Zhu SJ, Li ZG, Li Z, Chen C, Sun L, Tang W, Liu R, Sun Y, Yu M. Nitrogen-doped carbon dots with excitation-independent long-wavelength emission produced by room-temperature reaction. *Chemical Communications* 2016; 52: 11912–11914.
- [7] Tian X, Sun Y, Fan S, Boudreau MD, Chen C, Ge C, Yin JJ. Photo generated charge carriers in molybdenum disulfide quantum dots with enhanced antibacterial activity. *ACS Appl Mater Interfaces* 2019; 115:4858–4866.
